# Supplementary material for: General synthesis of graphene-supported bicomponent metal monoxides as alternative high-performance Li-ion anodes to binary spinel oxides
Source: Royal Society of Chemistry journal article supplement (doi:10.1039/c6ta07936a), 2016-12-09
Supplement: c6ta07936a1.pdf [file c6ta07936a1.pdf]

## Electronic Supplementary Information (ESI)

# General Synthesis of Graphene-Supported Bicomponent Metal Monoxides as Alternative High- Performance Li-Ion Anodes to Binary Spinel Oxides

Dong Wang,<sup>a</sup> Rui Zhang,<sup>a</sup> Jieying Li,<sup>b</sup> Xiaojing Hao,<sup>b</sup> Chunyan Ding,<sup>a</sup> Limin Zhao,<sup>b</sup> Guangwu Wen<sup>\*a,b,d</sup>, Jinping Liu<sup>\*c</sup> and Weiwei Zhou,<sup>\*b</sup>

<sup>a</sup>School of Materials Science and Engineering, Harbin Institute of Technology, Harbin 150001, China.

<sup>b</sup>School of Materials Science and Engineering, Harbin Institute of Technology at Weihai, Weihai 264209, China.

<sup>c</sup>School of Chemistry, Chemical Engineering and Life Science and State Key Laboratory of Advanced Technology for Materials Synthesis and Processing, Wuhan University of Technology, Wuhan, Hubei 430070, China.

<sup>d</sup>School of Materials Science and Engineering, Shandong University of Technology, Zibo 255000, China.

\*Address correspondence to [zhouweiwei@hit.edu.cn](mailto:zhouweiwei@hit.edu.cn); [g.wen@hit.edu.cn](mailto:g.wen@hit.edu.cn); [liujp@whut.edu.cn](mailto:liujp@whut.edu.cn)

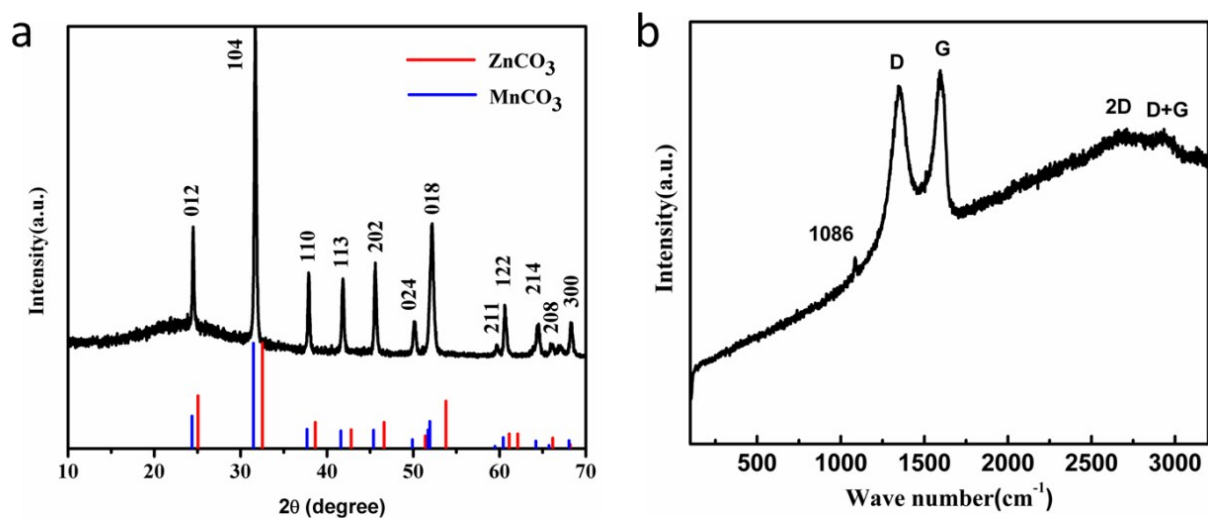

**Fig. S1** (a) XRD pattern and (b) Raman spectrum of the as-prepared  $\text{Zn}_x\text{Mn}_{1-x}\text{CO}_3/\text{GF}$ . Because of the same crystal structure and close solubility product constants of  $\text{ZnCO}_3$  and  $\text{MnCO}_3$ , they would precipitate simultaneously. All the well-defined diffraction peaks could be attributed to  $\text{ZnCO}_3$  (JCPDS card no. 08-0449) and  $\text{MnCO}_3$  (JCPDS card no. 83-1763). In the Raman spectrum, the tiny peak at  $1086\text{ cm}^{-1}$  is assigned to the symmetric C-O stretching ( $\nu_1$ ), indicating the presence of  $\text{Zn}_x\text{Mn}_{1-x}\text{CO}_3$  in the composites. Two obvious peaks at  $1595\text{ cm}^{-1}$  and  $1365\text{ cm}^{-1}$  are attributed to G and D band of graphene, respectively.

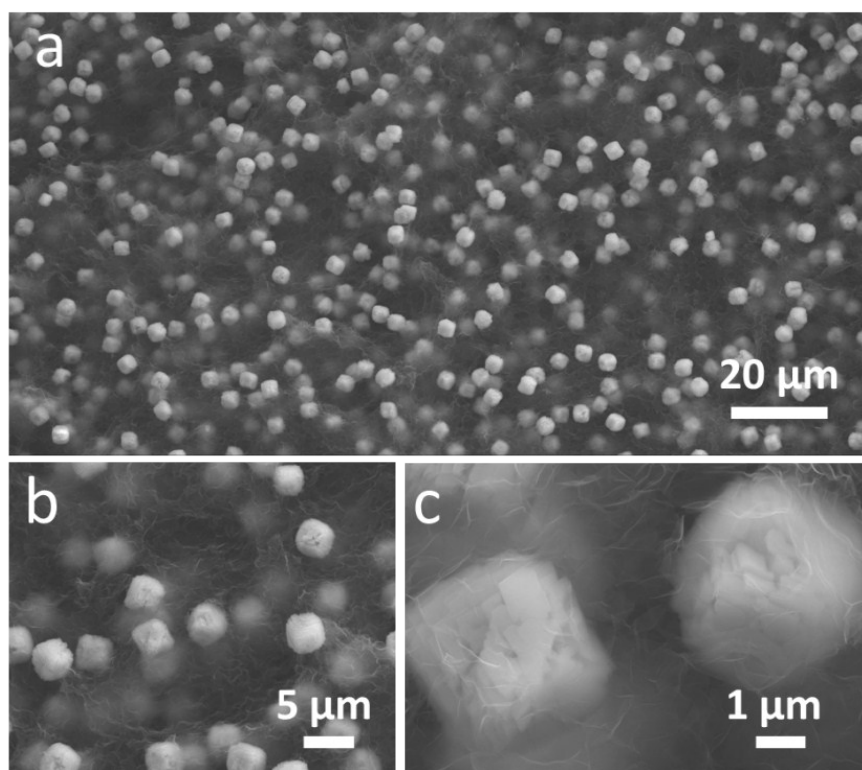

**Fig. S2** Typical FESEM images of the as-prepared  $Zn_xMn_{1-x}CO_3/GF$ .

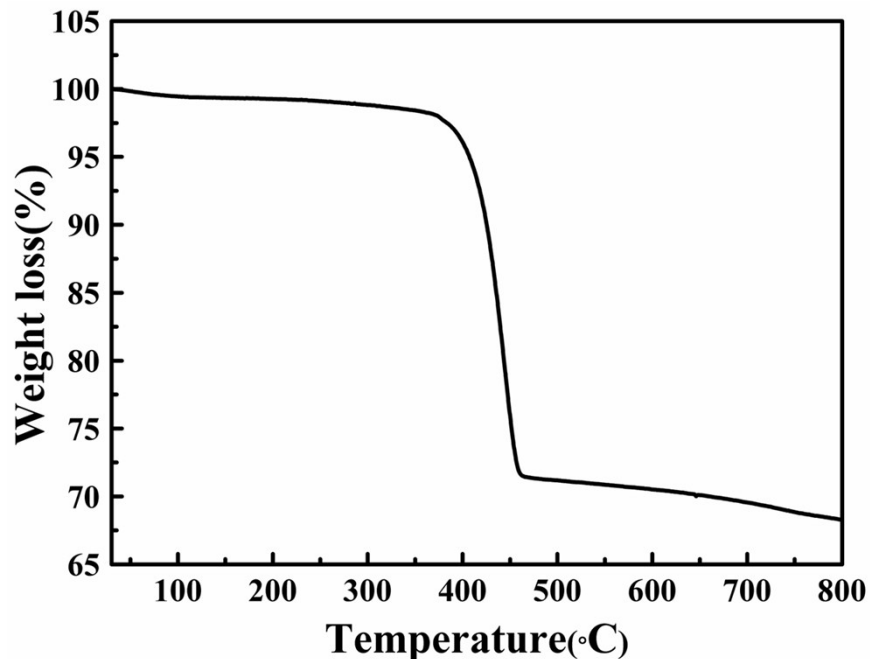

**Fig. S3** TG curve of  $Zn_xMn_{1-x}CO_3/GF$  in inert atmosphere. The slight weight loss from room temperature to 200 °C is owing to the evaporation of absorbed water. The large weight loss between 200 °C to 600 °C is mainly due to the decomposition of  $Zn_xMn_{1-x}CO_3$  as well as the further reduction of rGO. The  $Zn_xMn_{1-x}CO_3/GF$  precursor was annealed at the selected temperatures to investigate the composition evolution. Finally, 600 °C was chosen to completely transform the precursor into bicomponent metal oxides/GF.

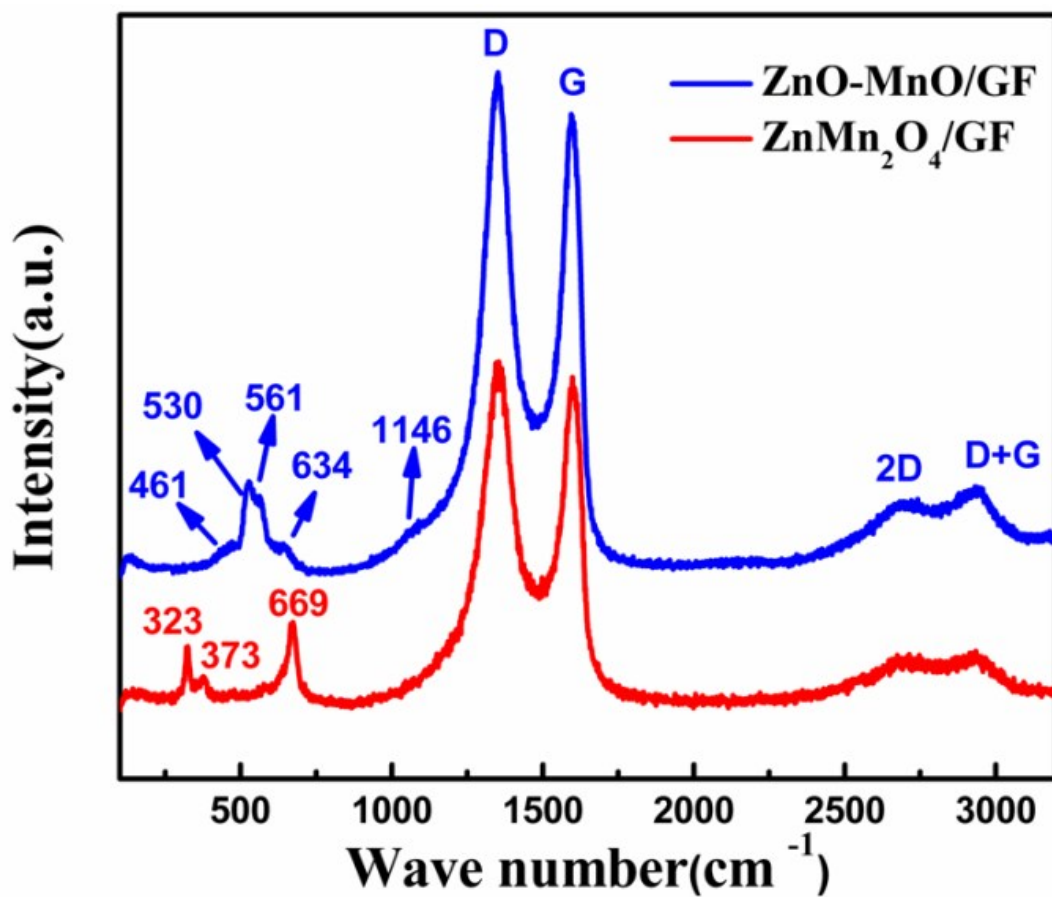

**Fig. S4** Raman spectra of ZnO-MnO/GF and ZnMn<sub>2</sub>O<sub>4</sub>/GF. In the Raman spectrum of ZnMn<sub>2</sub>O<sub>4</sub>/GF, the three peaks at 323, 373 and 669 cm<sup>-1</sup> are attributed to spinel ZnMn<sub>2</sub>O<sub>4</sub>.

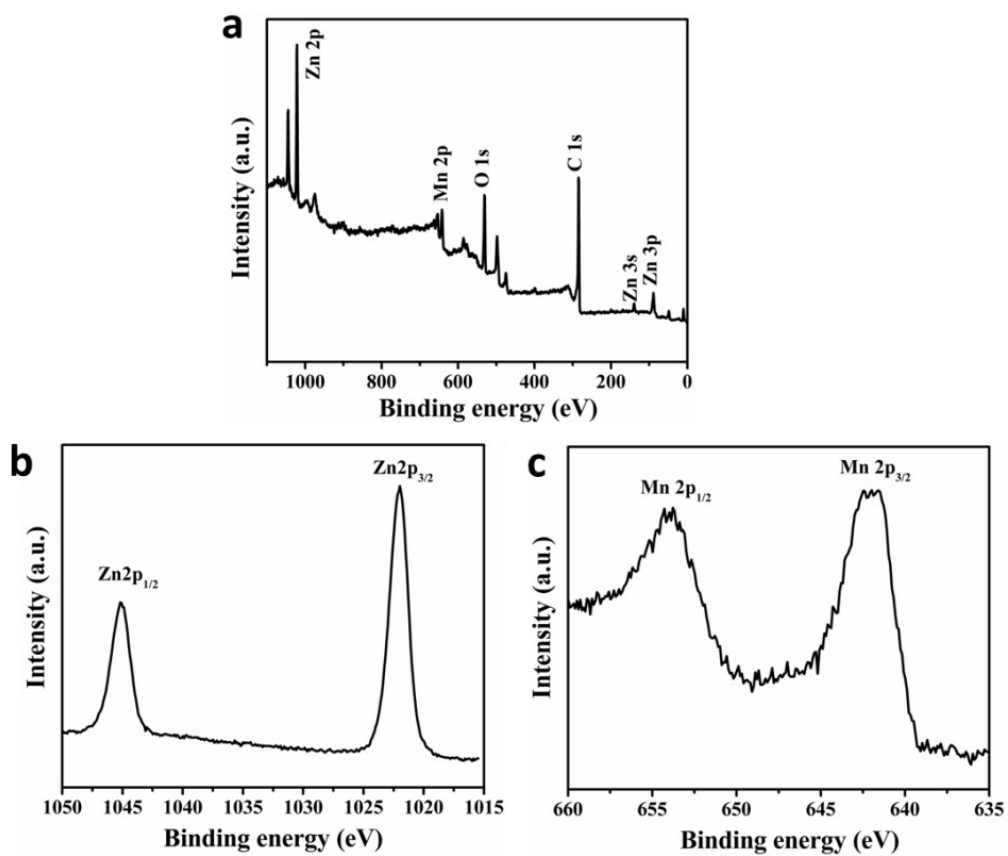

**Fig. S5** XPS spectra for the ZnO-MnO/GF: (a) survey spectrum and high-resolution; (b) Zn 2p and (c) Mn 2p spectrum.

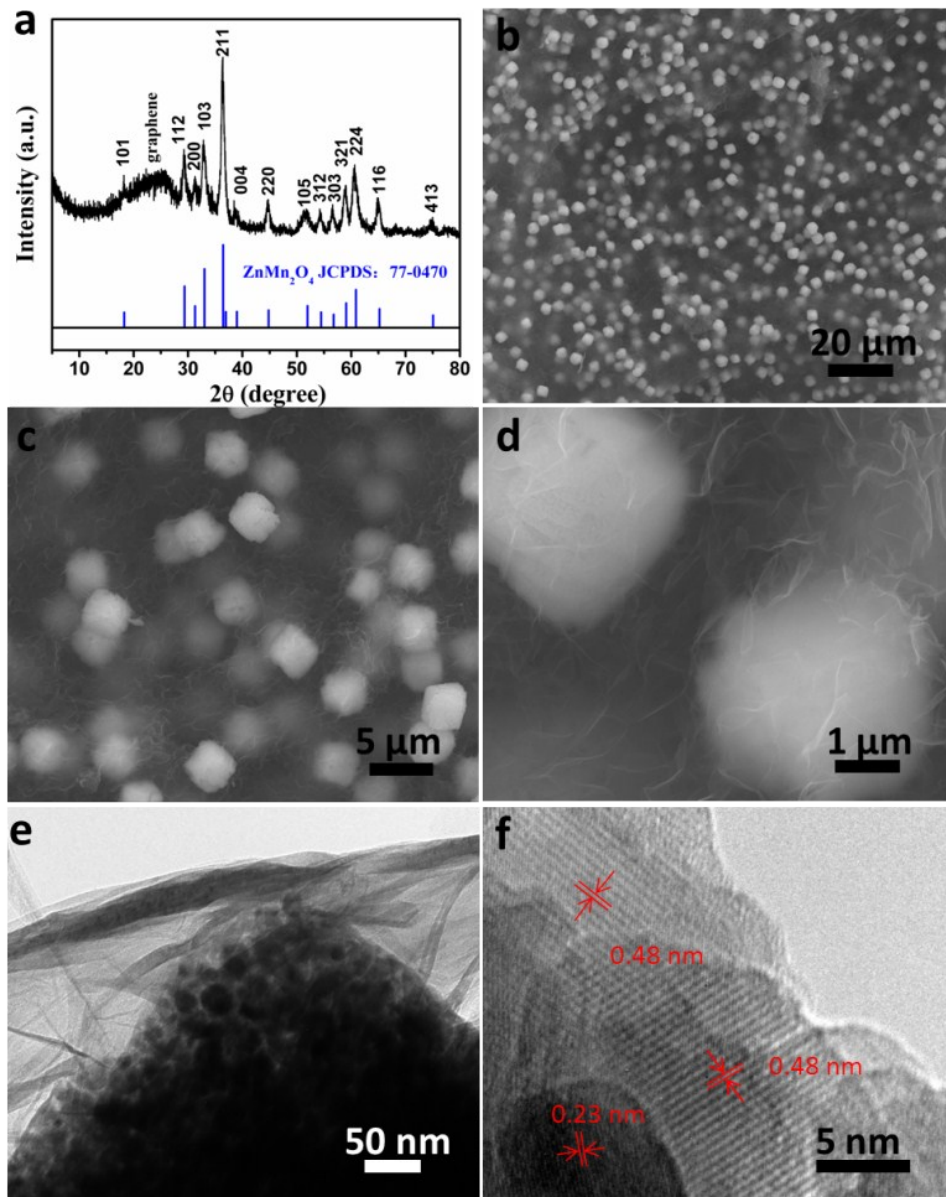

**Fig. S6** Structure and morphology analyses of ZnMn<sub>2</sub>O<sub>4</sub>/GF: (a) XRD pattern; (b-c) typical FESEM images; (e) TEM image; (f) HRTEM image. The regular lattice fringes with interplanar spacings of 0.23 and 0.48 nm in (f) come from the (004) and (101) plane of spinel ZnMn<sub>2</sub>O<sub>4</sub>, respectively.

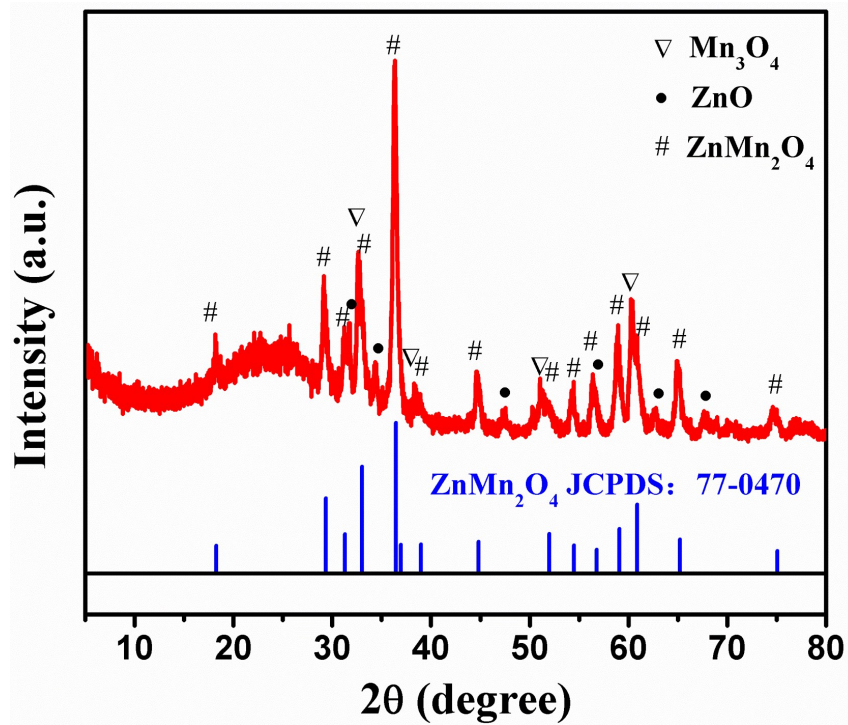

Fig. S7 XRD pattern of the product obtained by treating the  $\text{Zn}_x\text{Mn}_{1-x}\text{CO}_3/\text{GF}$  hybrid at 520 °C.



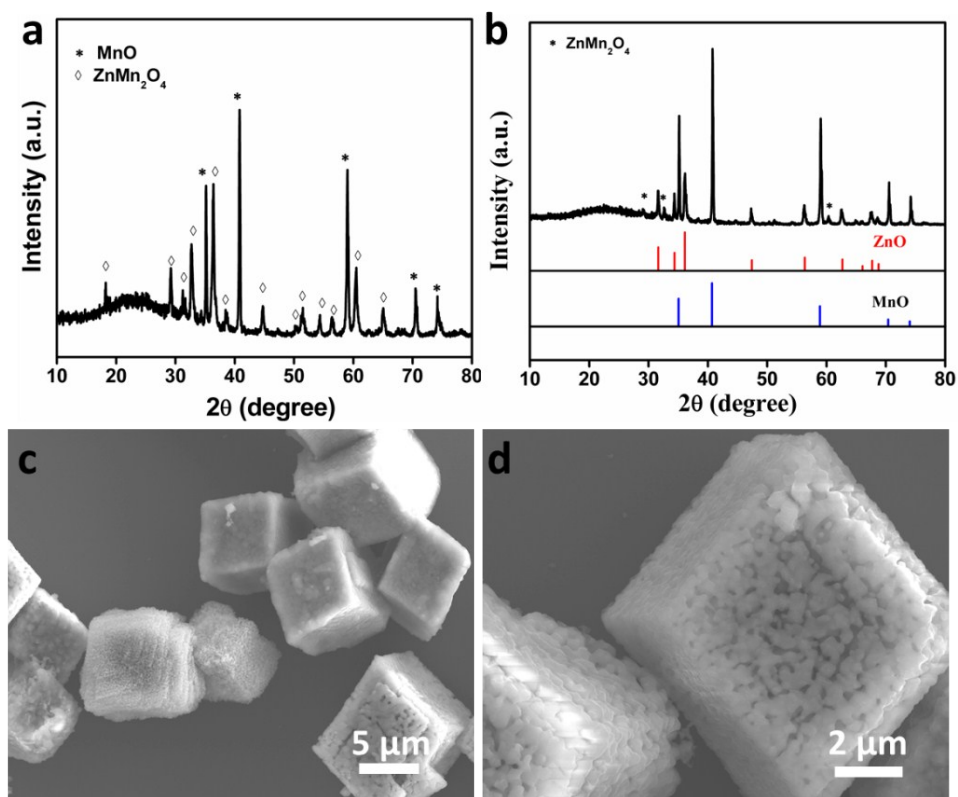

**Fig. S8** XRD patterns of the products without adding graphene and annealed at: (a) 600 °C and (b) 700 °C. (c and d) FESEM images of the products without adding graphene and annealed at 700 °C.

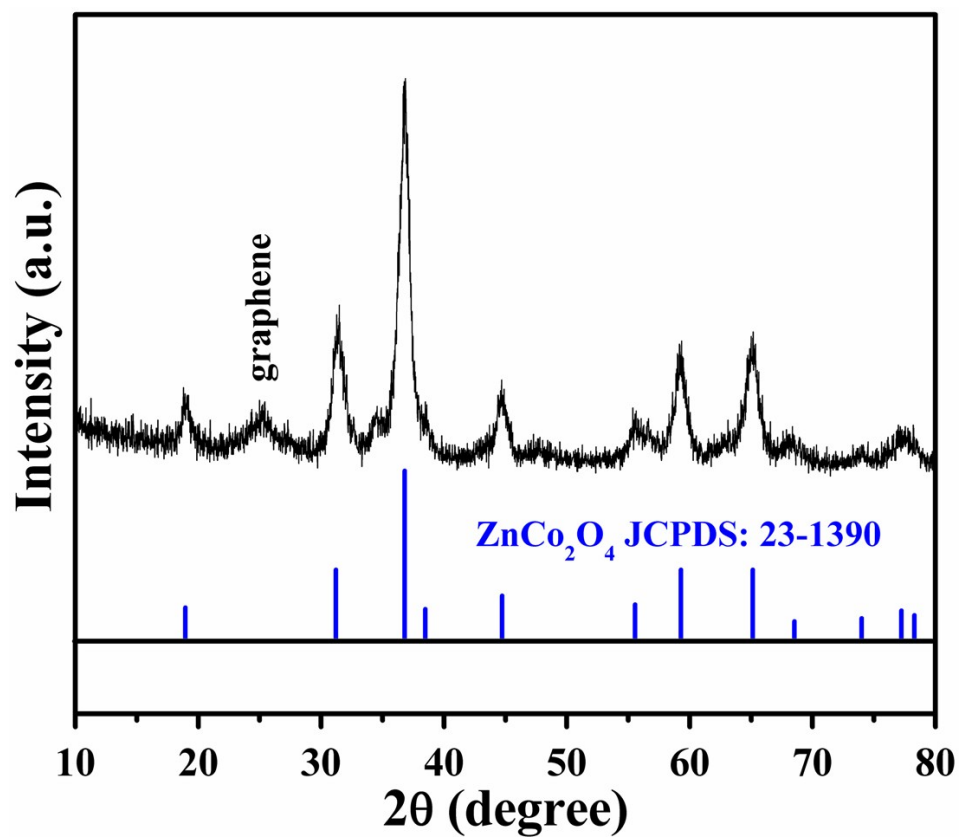

**Fig. S9** XRD pattern of the calcination product of ZnCo-containing precursor/GF at 350 °C.

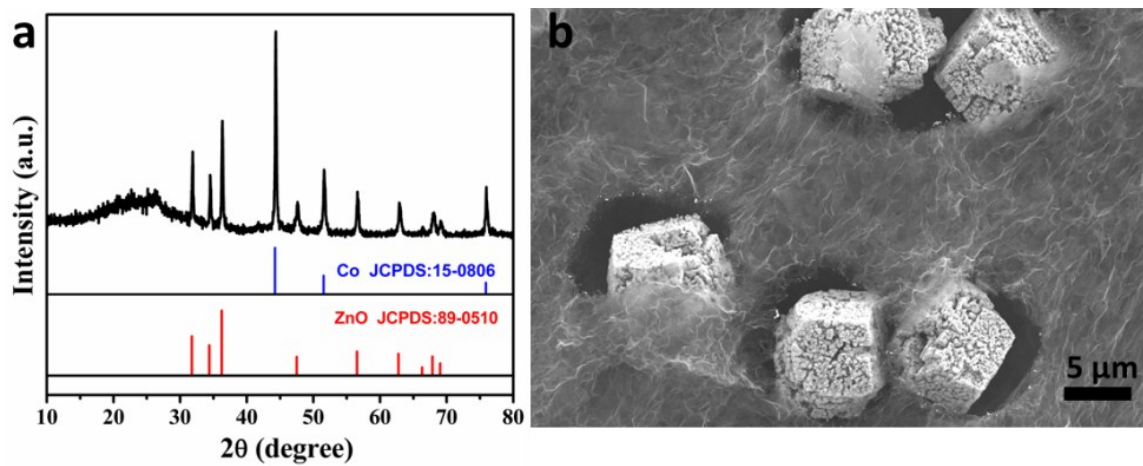

**Fig. S10** (a) XRD pattern and (b) FESEM image of the calcination product of ZnCo-containing precursor/GF at 600 °C. The voids between porous polyhedrons and graphene can be ascribed to the reaction of CoO with adjacent graphene at 600 °C.

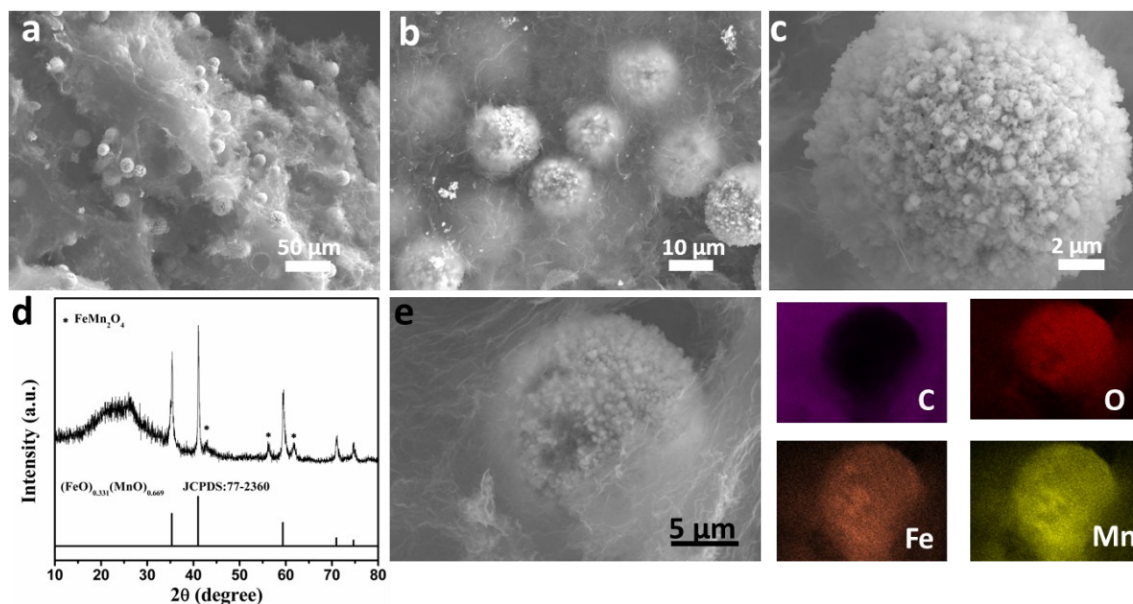

**Fig. S11** Structural and morphology analyses of  $(\text{FeO})_{0.333}(\text{MnO})_{0.667}/\text{GF}$ . (a-c) typical FESEM images, showing that porous  $(\text{FeO})_{0.333}(\text{MnO})_{0.667}$  microspheres are uniformly dispersed in the GF; (d) XRD pattern. The intense diffraction peaks are assigned to  $(\text{FeO})_{0.333}(\text{MnO})_{0.667}$  (JCPDS card no. 77-2360). (e) STEM image and corresponding element mappings of C, O, Fe, and Mn.

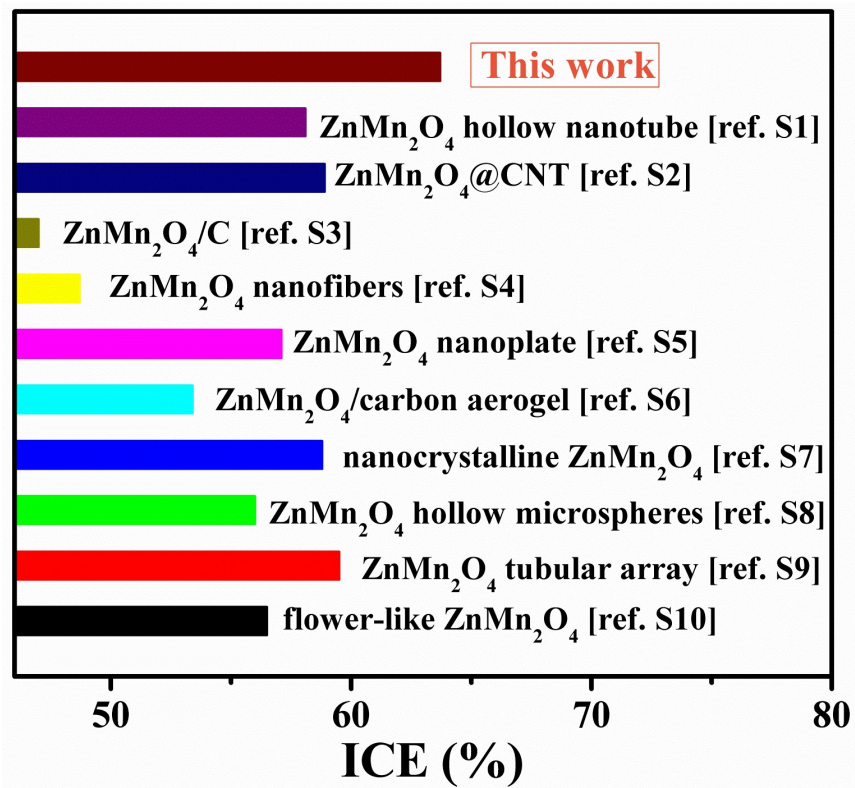

**Fig. S12** Comparison of ICEs between our ZnO-MnO/GF electrode and other ZnMn<sub>2</sub>O<sub>4</sub>-based electrodes.

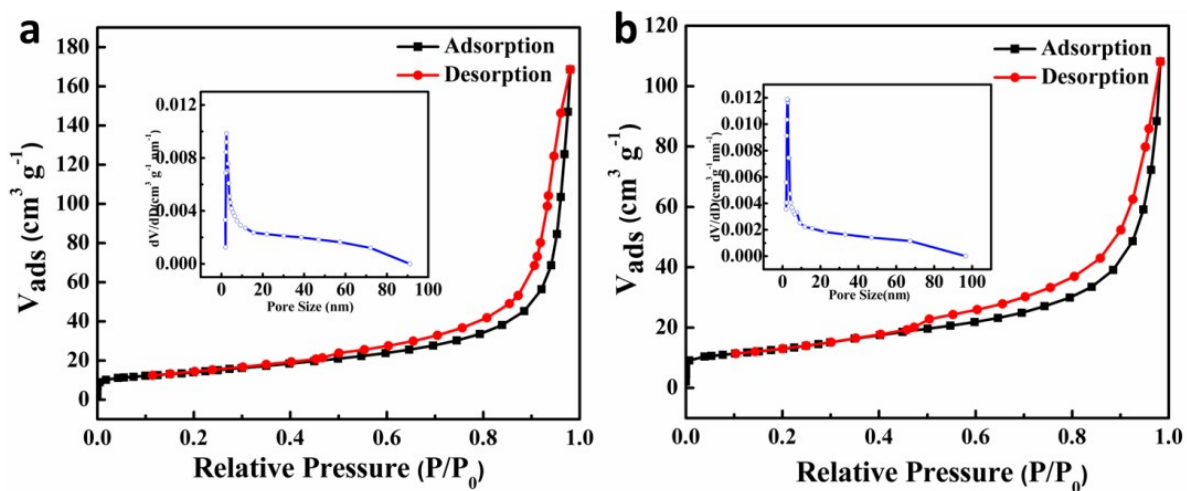

**Fig. S13** Nitrogen adsorption-desorption isotherm and the corresponding pore size distribution curves of (a) ZnMn<sub>2</sub>O<sub>4</sub>/GF and (b) ZnO-MnO/GF. The ZnO-MnO/GF exhibits comparable specific surface area and similar pore size distribution to ZnMn<sub>2</sub>O<sub>4</sub>/GF.

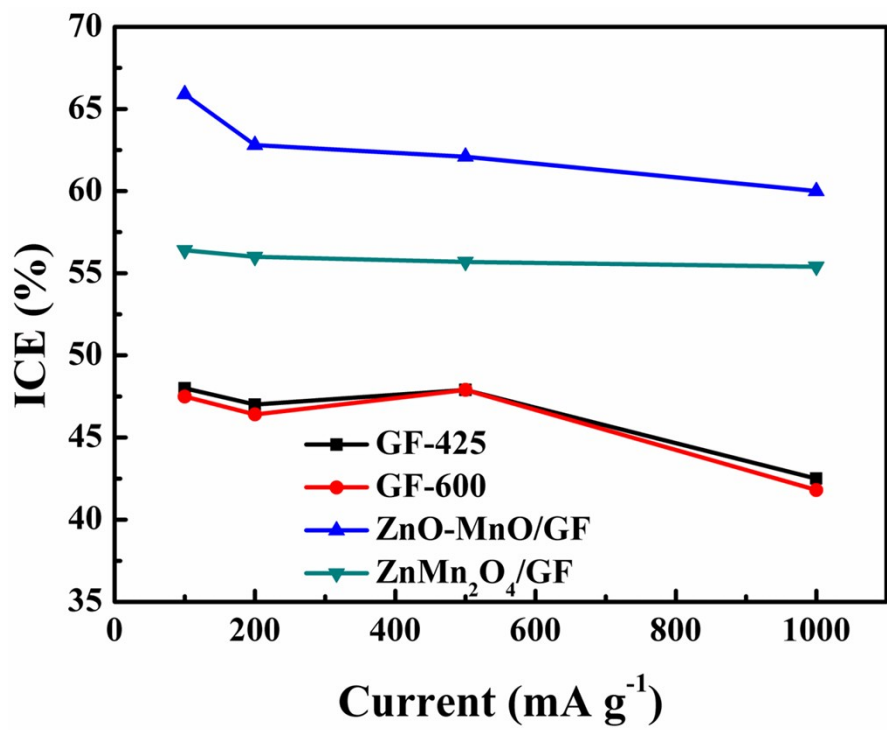

**Fig. S14** Comparison of ICE at different current densities among GF-425, GF-600, ZnO-MnO/GF, and ZnMn<sub>2</sub>O<sub>4</sub>/GF electrodes.

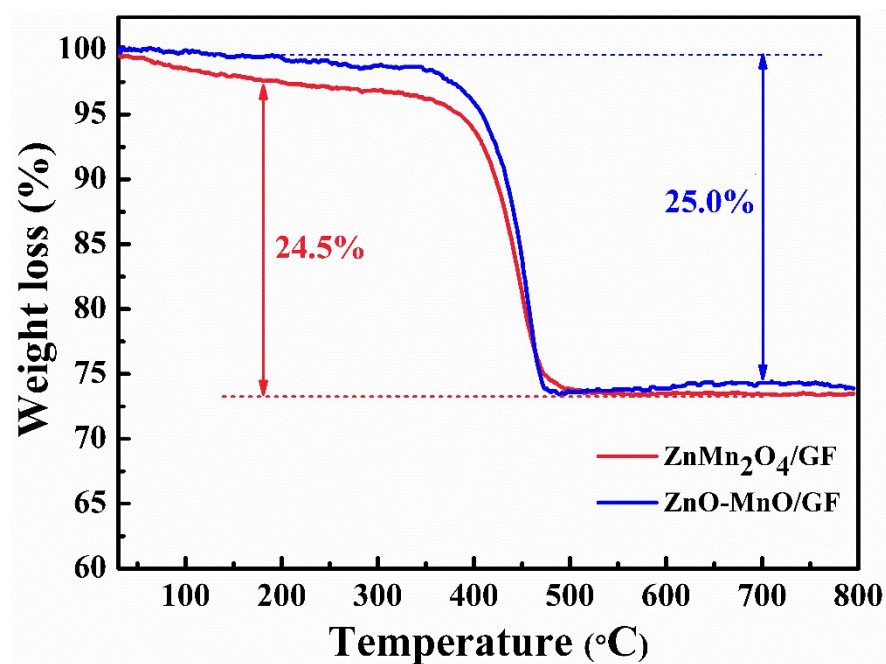

**Fig. S15** TG curves of ZnO-MnO/GF and ZnMn<sub>2</sub>O<sub>4</sub>/GF hybrids, showing similar graphene content. According to previous studies, the final product of MnO after annealing at high temperature in air is Mn<sub>2</sub>O<sub>3</sub>.<sup>S11</sup> Based on the theoretical value (11.3 wt%) of weight gain from MnO to Mn<sub>2</sub>O<sub>3</sub>, the graphene content in the ZnO-MnO/GF is evaluated to be 30 wt%.



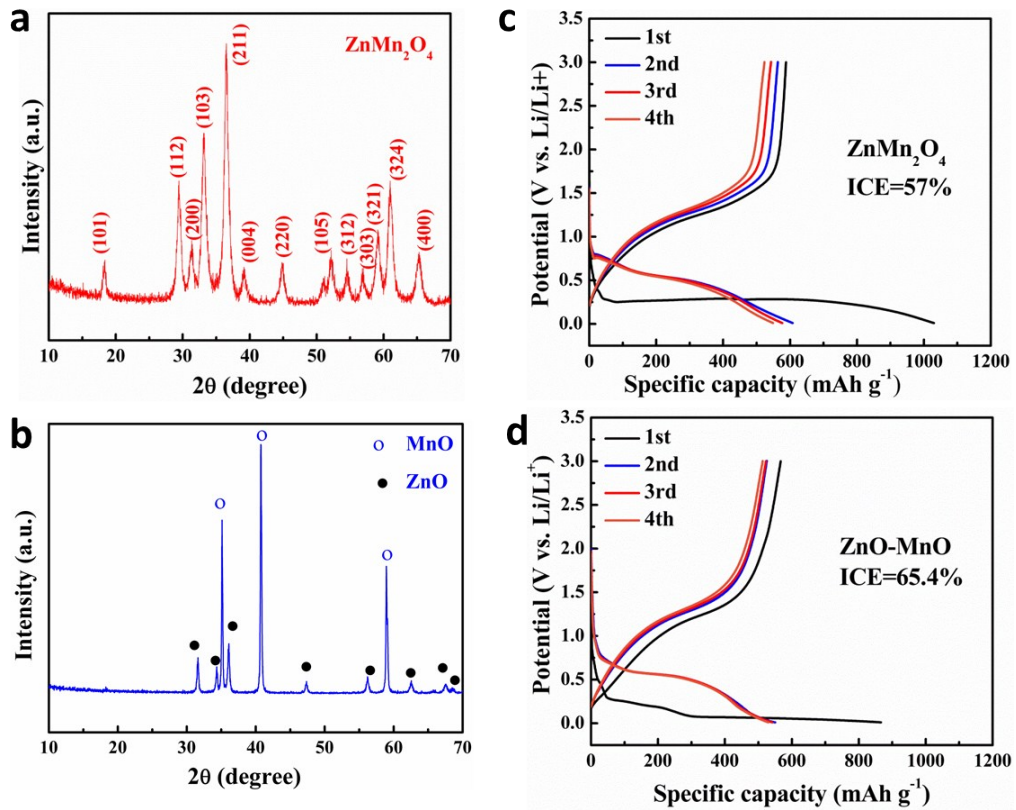

**Fig. S16** (a and b) XRD patterns and (c and d) charge-discharge voltage profiles at  $0.5 \text{ A g}^{-1}$  of (a and c) pure  $\text{ZnMn}_2\text{O}_4$  and (b and d) pure ZnO-MnO.

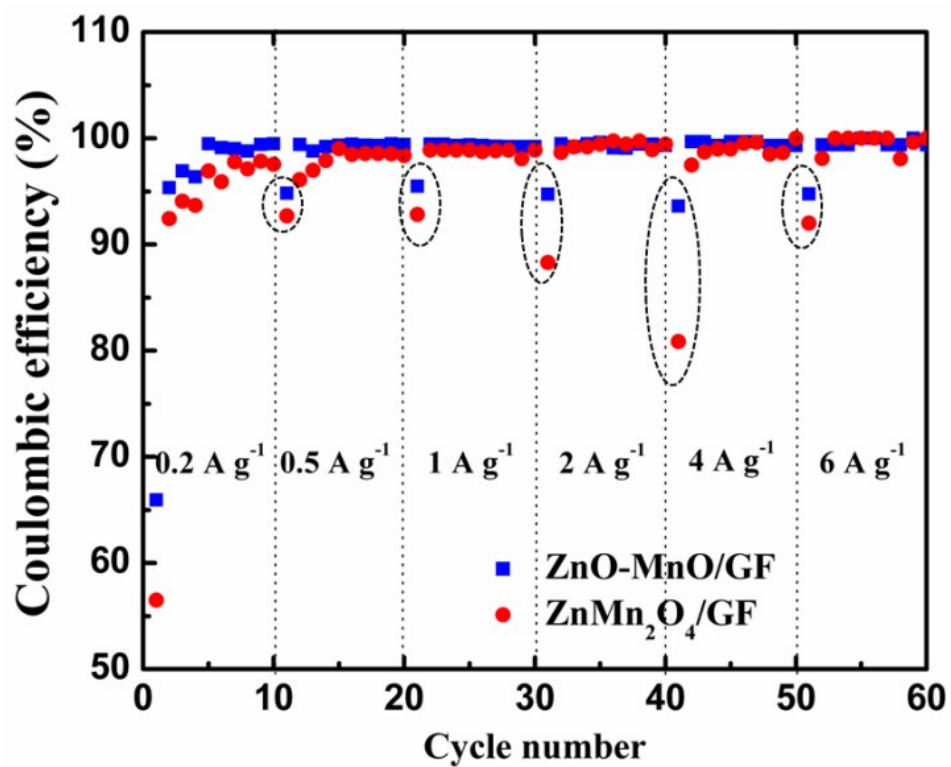

**Fig. S17** Comparison of coulombic efficiency between ZnO-MnO/GF and ZnMn<sub>2</sub>O<sub>4</sub>/GF electrodes during current-changing cycling.

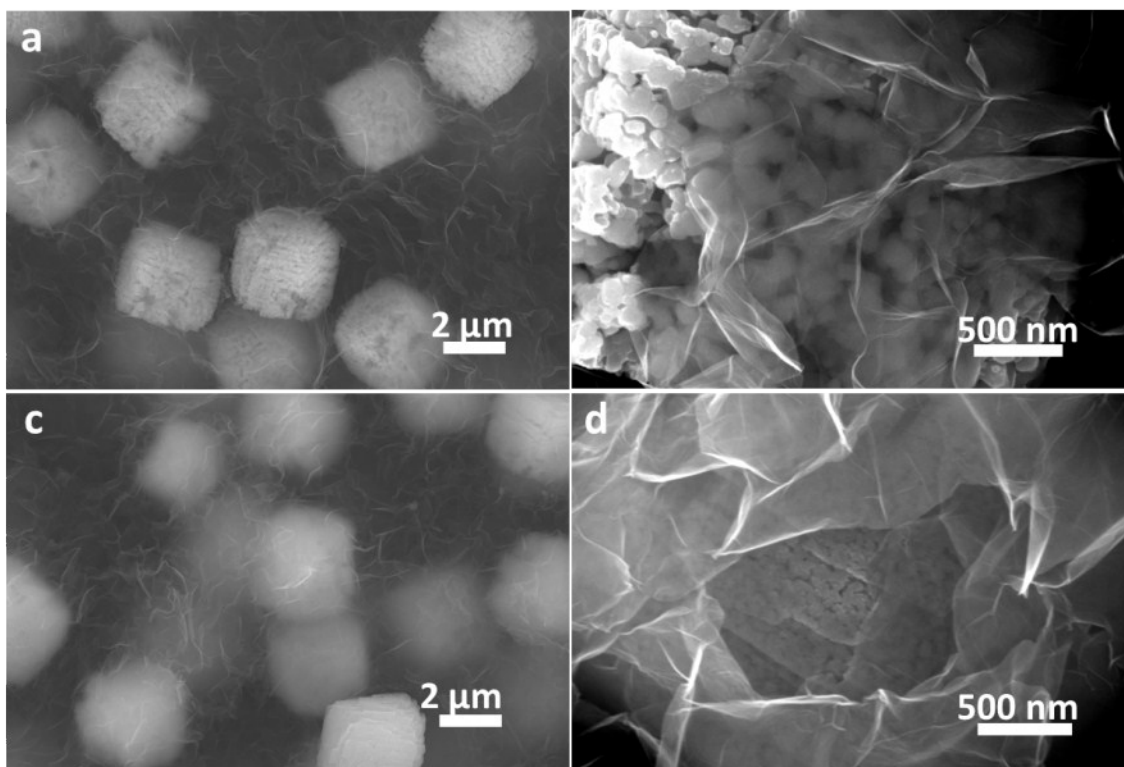

**Fig. S18** Typical low- and high-magnification FESEM images of (a, b) ZnO-MnO/GF and (c, d) ZnMn<sub>2</sub>O<sub>4</sub>/GF, revealing that the ZnO-MnO/GF electrode possesses more porous structure than ZnMn<sub>2</sub>O<sub>4</sub>/GF, possibly due to more gases release and/or the re-crystallization of the MOs at high temperature.

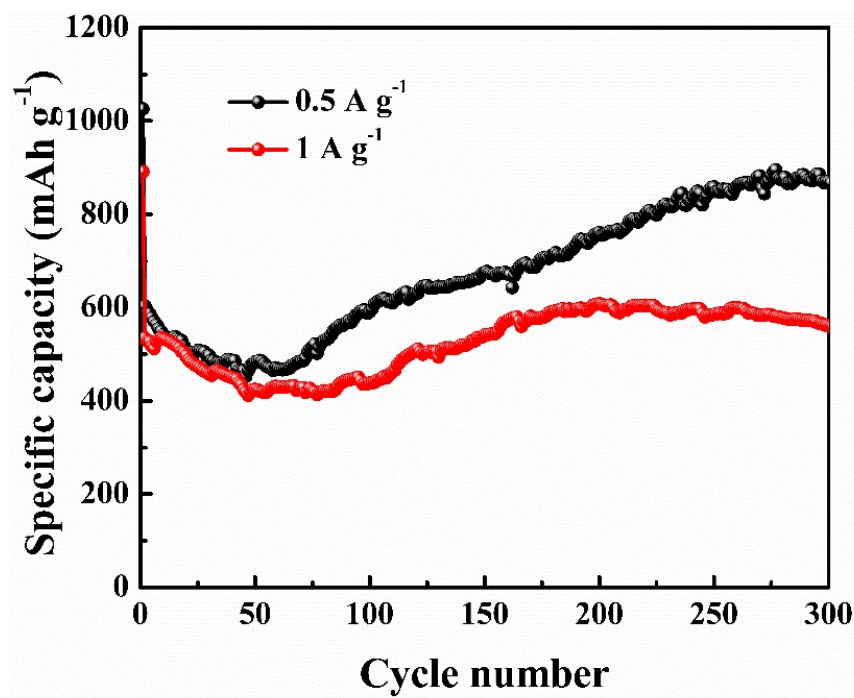

**Fig. S19** Long-term cyclic performance of ZnO-MnO/GF electrode at 0.5 and 1 A g<sup>-1</sup>. In both cases, the capacity increases gradually from about the 60<sup>th</sup> cycle.

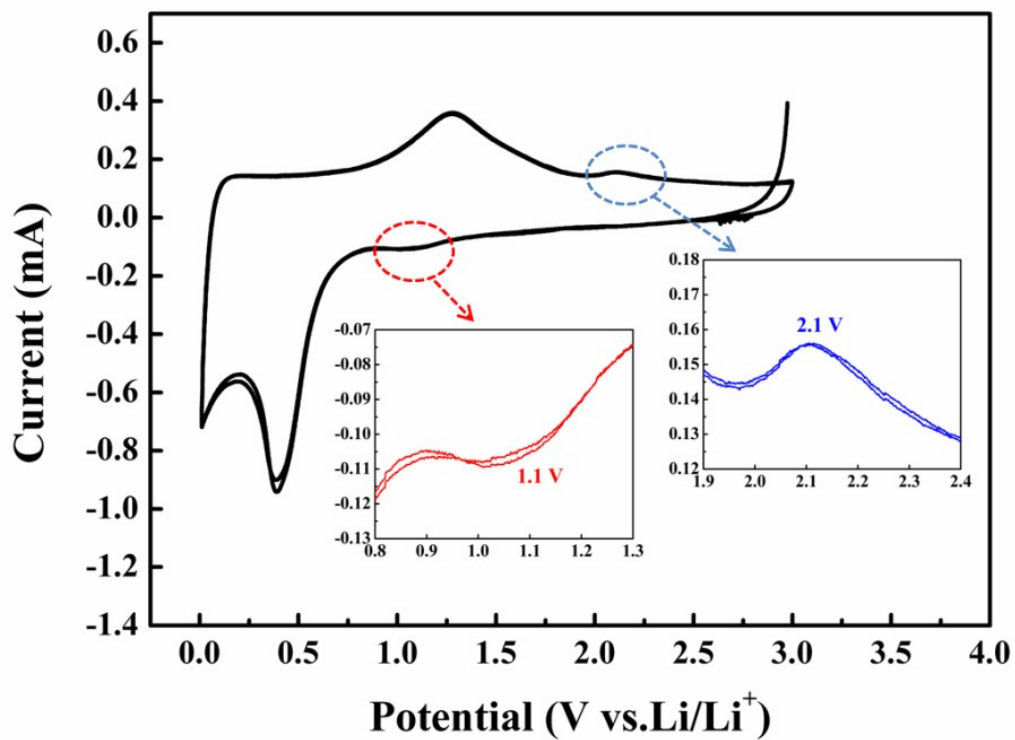

**Fig. S20** CV of the ZnO-MnO/GF electrode after 150 charge/discharge cycles at 0.5 A g<sup>-1</sup>. The minor oxidation peak at ~ 2.1 V is ascribed to Mn<sup>2+</sup> to high valence Mn, while the reduction peak at 1.1 V is originated from the conversion of high valence Mn to Mn<sup>2+</sup>.

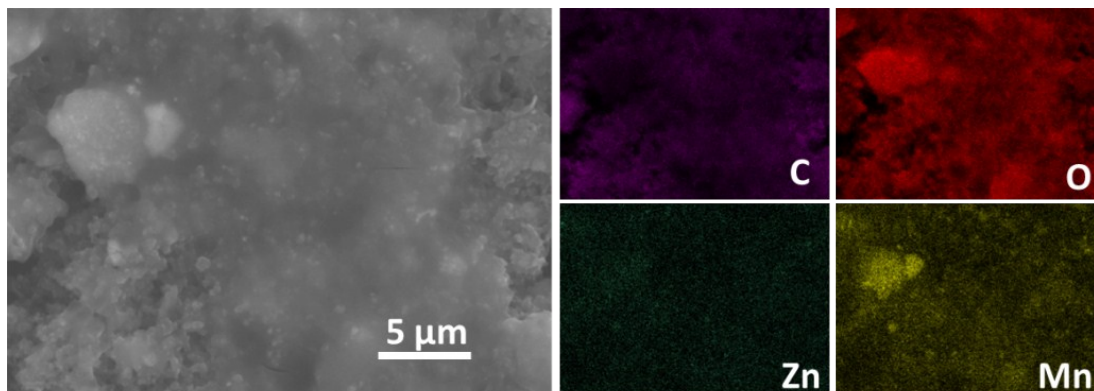

**Fig. S21** STEM image and corresponding element mapping of C, O, Zn, and Mn in ZnO-MnO/GF electrode after 300 cycles at  $0.5 \text{ A g}^{-1}$ .

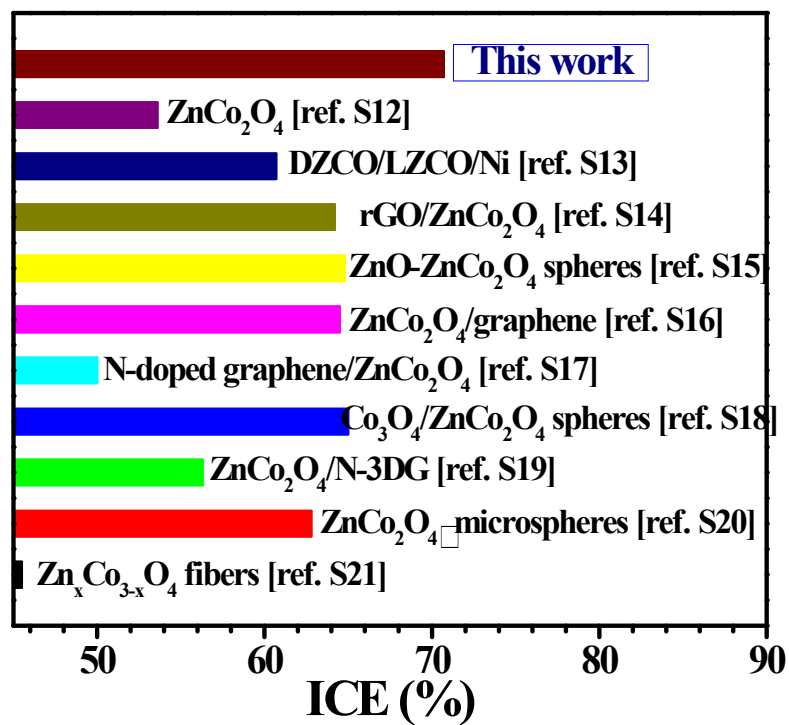

**Fig. S22** Comparison of ICEs between our ZnO-CoO/GF electrode and other ZnCo<sub>2</sub>O<sub>4</sub>-based electrodes.

## Reference

- S1. L. H. Zhang, S. Q. Zhu, H. Cao, L. R. Hou and C. Z. Yuan, *Chem. -Eur. J.*, 2015, 21, 10771-10777.
- S2. W. Yao, J. G. Xu, J. Wang, J. H. Luo, Q. L. Shi and Q. Zhang, *ACS Sustain. Chem. Eng.*, 2015, 3, 2170-2177.
- S3. M. H. Alfaruqi, A. K. Rai, V. Mathew, J. Jo and J. Kim, *Electrochim. Acta*, 2015, 151, 558-564.
- S4. P. F. Teh, Y. Sharma, Y. W. Ko, S. S. Pramana and M. Srinivasan, *RSC Adv.*, 2013, 3, 2812-2821.
- S5. J. Zhao, F. Wang, P. Su, M. Li, J. Chen, Q. Yang and C. Li, *J. Mater. Chem.*, 2012, 22, 13328-13333.
- S6. L. Yin, Z. Zhang, Z. Li, F. Hao, Q. Li, C. Wang, R. Fan and Y. Qi, *Adv. Funct. Mater.*, 2014, 24, 4176-4185.
- S7. Y. Yang, Y. Zhao, L. Xiao and L. Zhang, *Electrochem. Commun.*, 2008, 10, 1117-1120.
- S8. L. Zhou, H. B. Wu, T. Zhu and X. W. Lou, *J. Mater. Chem.*, 2012, 22, 827-829.
- S9. J. G. Kim, S. H. Lee, Y. Kim and W. B. Kim, *ACS Appl. Mater. Interfaces*, 2013, 5, 11321-11328.
- S10. L. Xiao, Y. Yang, J. Yin, Q. Li and L. Zhang, *J. Power Sources*, 2009, 194, 1089-1093.
- S11. Y. M. Sun, X. L. Hu, W. Luo, F. F. Xia and Y. H. Huang, *Adv. Funct. Mater.*, 2012, 23, 2436-2444.
- S12. C. C. Ai, M. C. Yin, C. W. Wang and J. T. Sun, *J. Mater. Sci.*, 2004, 39, 1077-1079.
- S13. H. Long, T. Shi, S. Jiang, S. Xi, R. Chen, S. Liu, G. Liao and Z. Tang, *J. Mater. Chem. A*, 2014, 2, 3741-3748.
- S14. G. Gao, H. B. Wu, B. Dong, S. Ding and X. W. Lou, *Adv. Sci.*, 2015, 2, 1400014.
- S15. Q. Xie, D. Zeng, Y. Ma, L. Lin, L. Wang and D.-L. Peng, *Electrochim. Acta*, 2015, 169, 283-290.
- S16. A. K. Rai and J. Kim, *Solid State Sci.*, 2015, 48, 90-96.
- S17. S. Sahoo, S. H. Bae, Y. S. Lee, J. M. Lee, J. M. Ahn, C. G. Kim and I. K. Oh, *Carbon*, 2015, 94, 455-463.
- S18. Q. Wang, B. Yu, X. Li, L. Xing and X. Xue, *J. Mater. Chem. A*, 2016, 4, 425-433.
- S19. F. Jiang, S. Zhao, J. Guo, Q. Su, J. Zhang and G. Du, *Mater. Lett.*, 2015, 161, 297-300.
- S20. D. Wang, X. Qi, H. Gao, J. Yu, Y. Zhao, G. Zhou and G. Li, *Mater. Lett.*, 2016, 164, 93-96.
- S21. Z. Xu, Y. Liu, W. Zhao, B. Li, X. Zhou and H. Shen, *Electrochim. Acta*, 2016, 190, 894-902.
